# Supplementary material
Source: MDPI journal article supplement (https://www.mdpi.com/1996-1073/11/11/2921)
Supplement: s1 [file s1]

## Supplementary Materials

# Ethanol Production from Corn Fiber Separated after Liquefaction in the Dry Grind Process

Chinmay V. Kurambhatti <sup>1</sup>, Deepak Kumar <sup>1</sup>, Kent D. Rausch <sup>1</sup>, M. E. Tumbleson <sup>1</sup> and Vijay Singh <sup>1,2,\*</sup>

<sup>1</sup> Agricultural and Biological Engineering, University of Illinois at Urbana-Champaign, Urbana, IL 61801, USA; cvk2@illinois.edu (C.V.K.); kumard@illinois.edu (D.K.); krausch@illinois.edu (K.D.R.); mtumbles@illinois.edu (M.E.T.)

<sup>2</sup> DOE Center for Advanced Bioenergy and Bioproducts Innovation, University of Illinois at Urbana-Champaign, Urbana, IL 61801, USA

\* Correspondence: vsingh@illinois.edu; Tel.: +1-217-333-9510

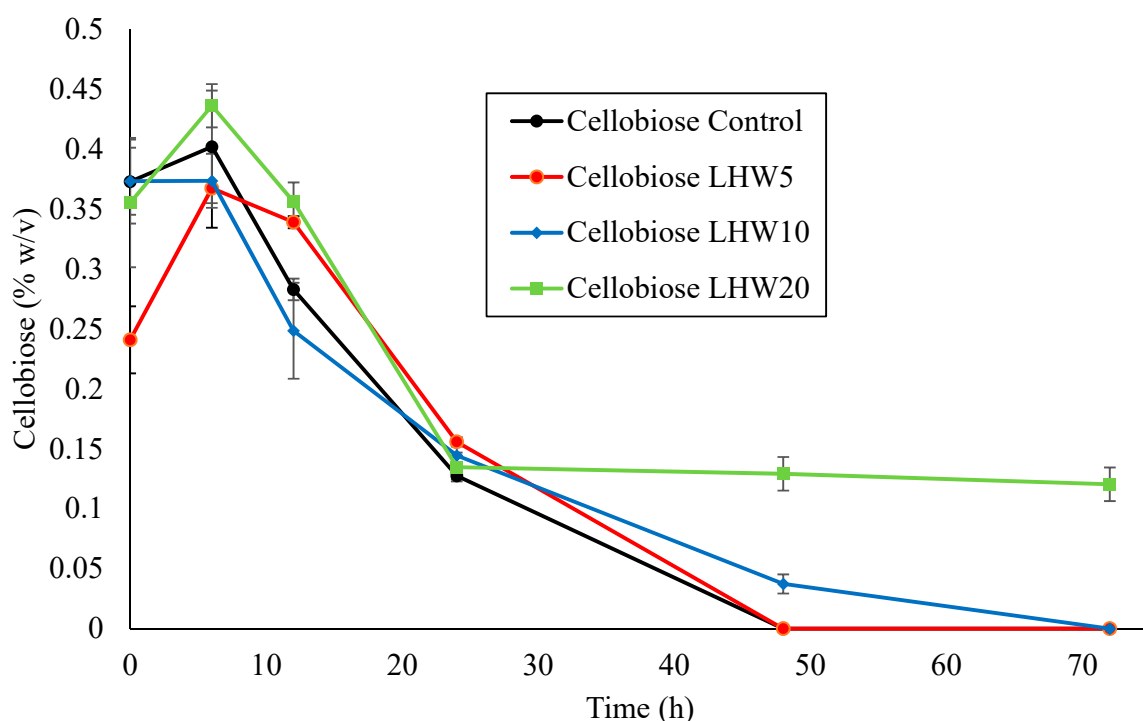

Figure S1. Cellobiose profiles for fiber pretreated with hot water.

Table S1. Ethanol concentrations achieved with different pretreatments after accounting for enzyme blanks.

| Pretreatment | Ethanol Concentration (% v/v) * | Gain in Ethanol Concentration (%) |
|--------------|---------------------------------|-----------------------------------|
| Control      | 3.06 ± 0.11 <sup>b</sup>        | 0                                 |
| LHW5         | 3.36 ± 0.06 <sup>c</sup>        | 10                                |
| LHW10        | 3.29 ± 0.19 <sup>cd</sup>       | 7                                 |
| LHW20        | 3.17 ± 0.06 <sup>abd</sup>      | 4                                 |

|       |                           |    |
|-------|---------------------------|----|
| WDM20 | 3.00 ± 0.15 <sup>a</sup>  | -2 |
| WDM45 | 3.15 ± 0.05 <sup>bd</sup> | 3  |

\* Mean ± standard deviations from three replicates. Means followed by same letter are not different at 95% level of significance (p>0.05).

**Table S2.** Ethanol concentrations achieved with excess cellulase dose after accounting for enzyme blanks.

| <b>Pretreatment</b> | <b>Ethanol Concentration<br/>(% v/v) *</b> | <b>Gain in Ethanol<br/>Concentration (%)</b> |
|---------------------|--------------------------------------------|----------------------------------------------|
| Control             | 2.88 ± 0.11 <sup>a</sup>                   | 0                                            |
| Excess Cellulase    | 3.78 ± 0.05 <sup>b</sup>                   | 31                                           |

\* Mean ± standard deviations from three replicates. Means followed by same letter are not different at 95% level of significance (p>0.05).
